# Supplementary material
Source: PubMed Central journal article supplement (PMC6503676)

**Cell Reports, Volume 26**

**Supplemental Information**

**The FBXW7-SHOC2-Raptor Axis Controls  
the Cross-Talks between the RAS-ERK  
and mTORC1 Signaling Pathways**

**Chuan-Ming Xie, Mingjia Tan, Xiao-Tong Lin, Di Wu, Yihan Jiang, Ye Tan, Haomin Li, Yuanyuan Ma, Xiufang Xiong, and Yi Sun**

**SUPPLEMENTAL FIGURE LEGENDS**

**The FBXW7-SHOC2-Raptor axis controls the cross-talks  
between the RAS/ERK and mTORC1 signaling pathways**

Chuan-Ming Xie, Mingjia Tan, Xiao-Tong Lin, Di Wu, Yihan Jiang, Ye Tan, Haomin Li,  
Yuanyuan Ma, Xiufang Xiong, and Yi Sun

**A**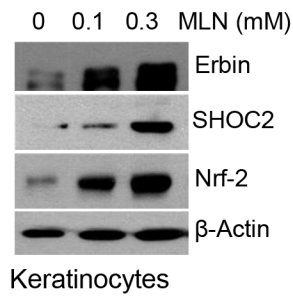**B**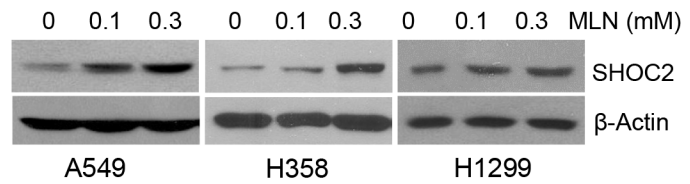**C**

| FBXW7 binding site consensus | L*TP                      | L*TP                                                  |
|------------------------------|---------------------------|-------------------------------------------------------|
| SHOC2 (Human)                | 238-CN <b>L</b> ITLDV-245 | 503-EN <b>L</b> L <b>L</b> THLP-510                   |
| SHOC2 (Chimpanzee)           | 238-CN <b>L</b> ITLDV-245 | 503-EN <b>L</b> L <b>L</b> THLP-510                   |
| SHOC2 (Cow)                  | 238-CN <b>L</b> ITLDV-245 | 503-EN <b>L</b> L <b>L</b> THLP-510                   |
| SHOC2 (Mouse)                | 238-CN <b>L</b> ITLDV-245 | 503-EN <b>L</b> L <b>L</b> THLP-510                   |
| SHOC2 (Dog)                  | 238-CN <b>L</b> ITLDV-245 | 503-EN <b>L</b> L <b>L</b> THLP-510                   |
| SHOC2 (Chicken)              | 238-CN <b>L</b> ITLDV-245 | 503-EN <b>L</b> L <b>L</b> THLP-510                   |
| SHOC2 (Xenopus)              | 233-CN <b>L</b> ITLDV-240 | 498-EN <b>L</b> L <b>L</b> THLP-505                   |
| SHOC2 (Zebrafish)            | 217-CN <b>L</b> ITLDV-224 | 482-EN <b>L</b> L <b>L</b> Q <b>H</b> L <b>P</b> -489 |

\*=I or L or P

**D**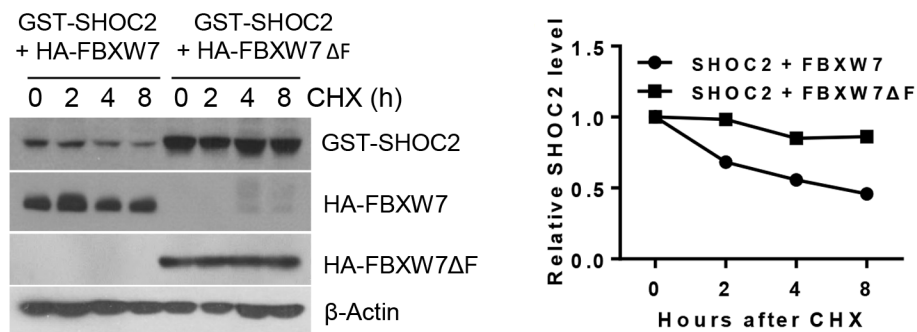**E**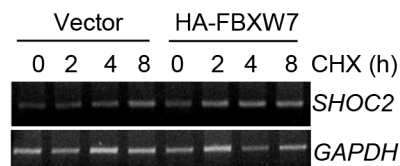**F**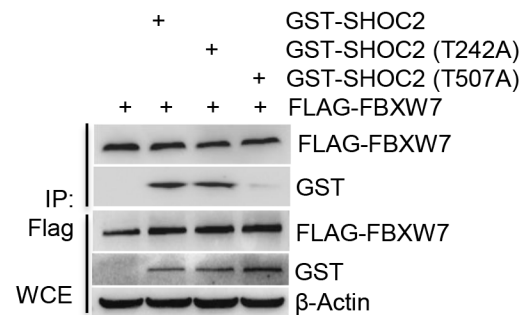

**Figure S1. SHOC2 is a novel substrate of FBXW7 (Related to Fig 1)**

**(A&B)** Mouse keratinocytes or lung cancer cells were treated with MLN4924 (MLN) for 24 hrs and then analyzed by IB.

**(C)** Evolutionary conservation of the FBXW7-binding motif on SHOC2 from eight different species.

**(D&E)** 293 (D) or H1299 (E) Cells were transfected with indicated plasmids for 48 hrs, followed by treatment with CHX for different time periods and harvested for IB (D) or RT-PCR (E). The band density was quantified by AlphaEaseFC software. The data shown are from a single representative experiment out of two repeats.

**(F)** 293 cells were transfected with indicated plasmids for 48 hrs, followed by IP and IB with indicated Abs. WCE, whole cell extract.

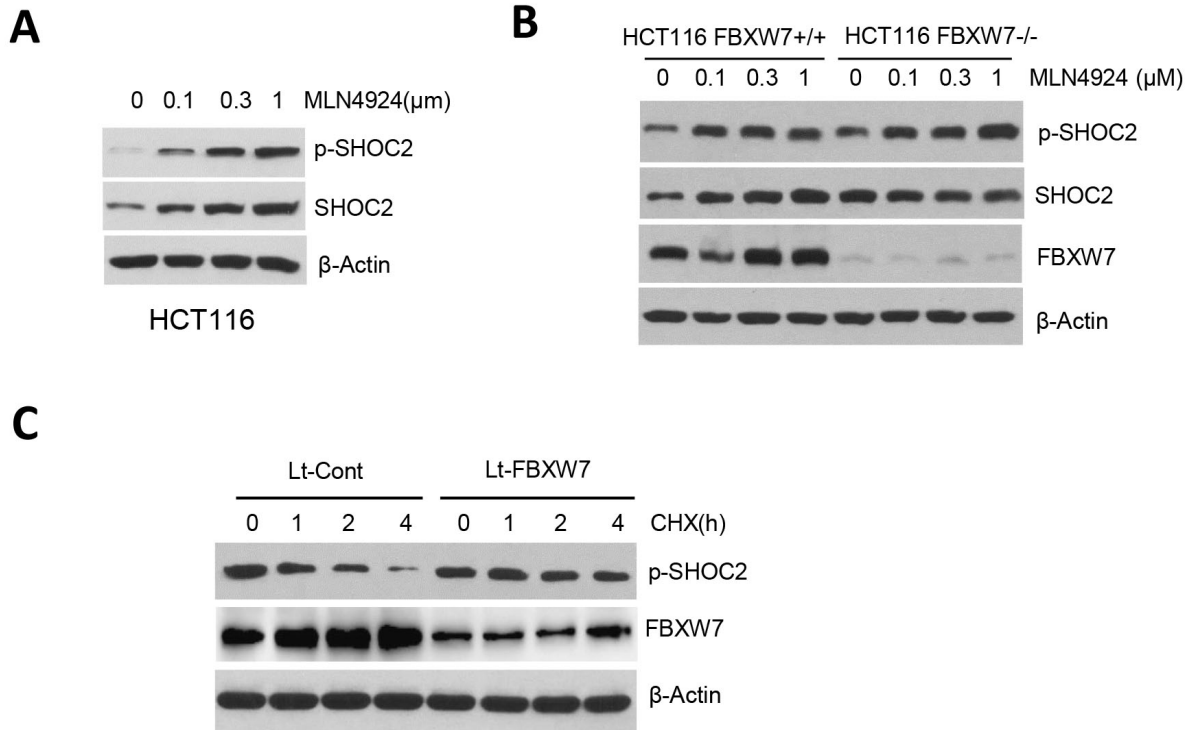

**Figure S2. SHOC2 is phosphorylated on Thr507 by ATR upon DNA damage (Related to Fig 2)**

**(A&B)** Cells were treated with MLN4924 (MLN) for 24 hrs and then analyzed by IB.

**(C)** H1299 cells were transfected with Control shRNA or FBXW7 shRNA for 48 hrs, followed by treatment with CHX for different time periods and harvested for IB.

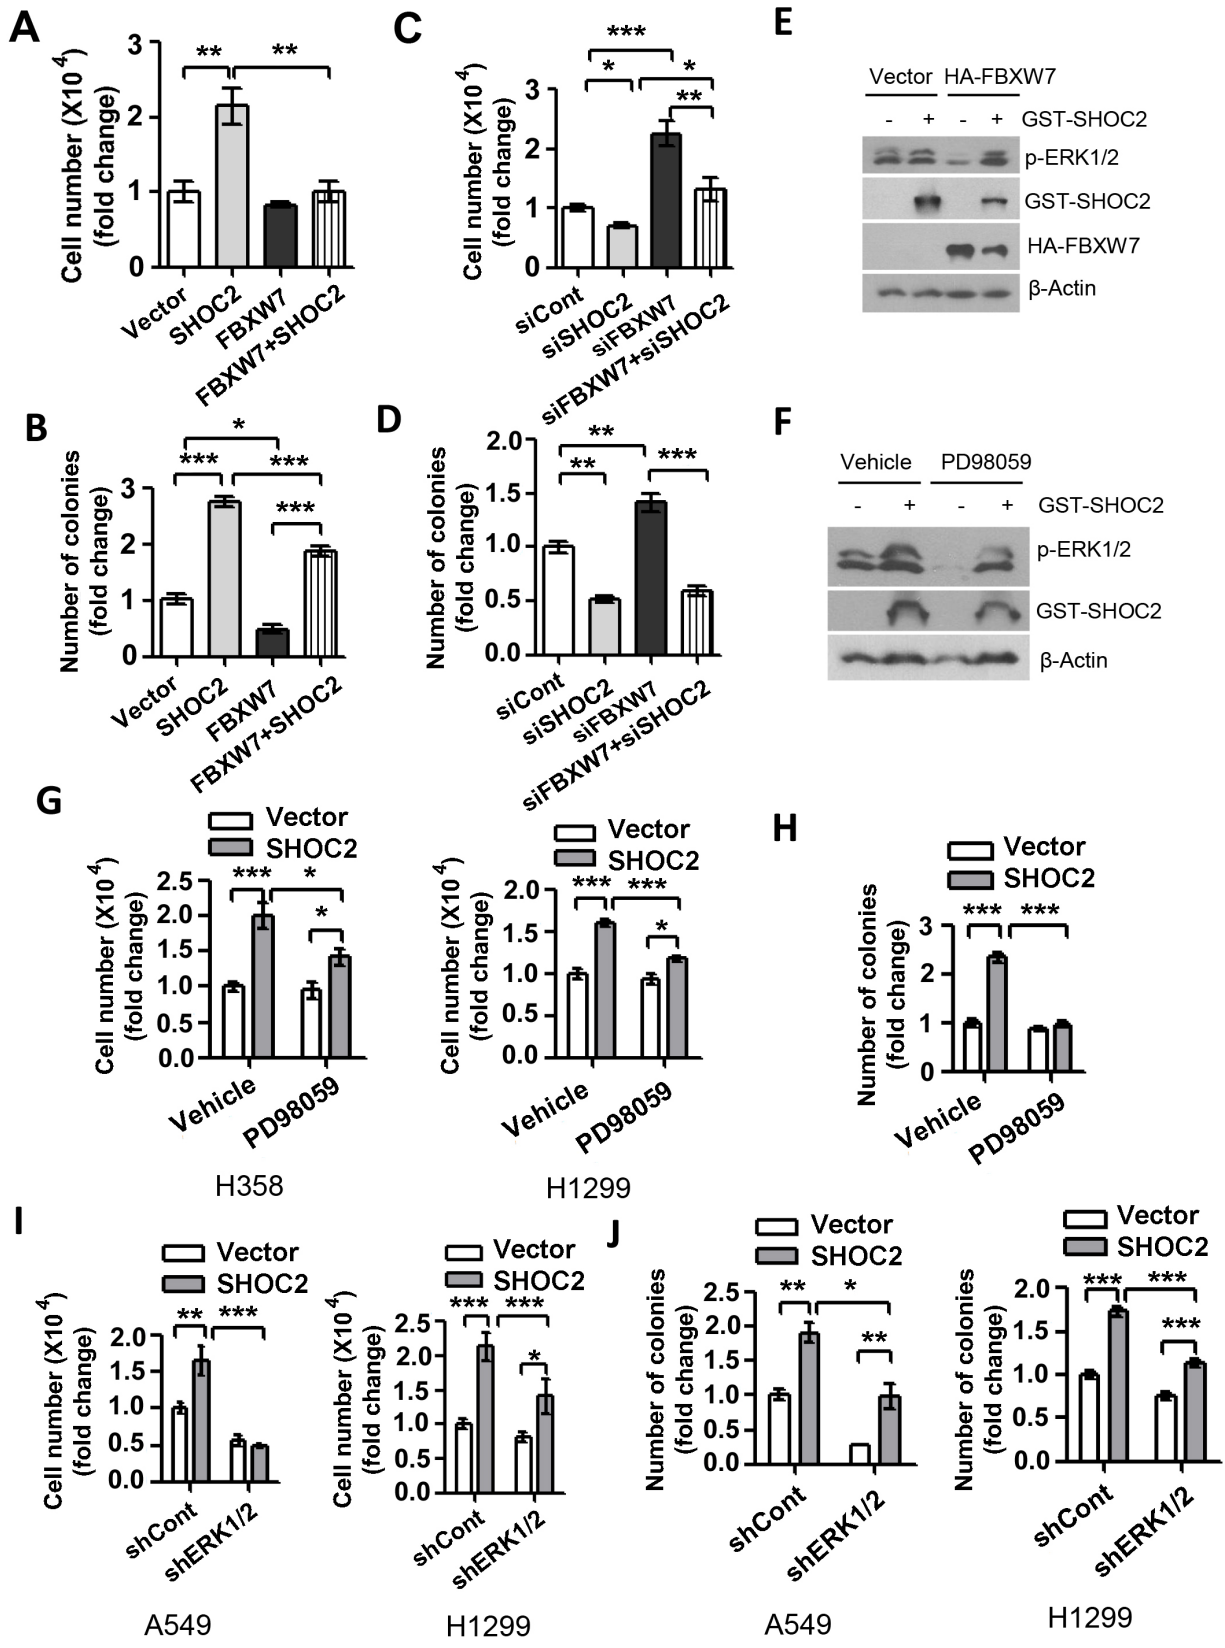

**Figure S3. SHOC2 promotes proliferation via ERK activation, blocked by FBXW7 (Related to Fig 3)**

**(A-D)** A549 cells were transfected with indicated plasmids or siRNA oligoes for 48 hrs. Cells were seeded and cell numbers counted 48 hrs later (A&C), or colonies counted 9-13 later (B&D).

**(E-H)** H358 (E&F, G left panel) or H1299 (H, G right panel) cells were transfected with indicated plasmids for 48 hrs, followed by IB with indicated Abs (E), or transfected with indicated plasmids for 24 hrs, then treated with PD98059 for 24 hrs, followed by IB (F), cell count (G) or colonies counted 9-13 later (H).

**(I&J)** Cells were transfected with shRNA targeting ERK1/2 (shERK1/2) in the presence or absence of SHOC2 overexpression for 48 hrs. Cells were plated, and cell number counted 48 hrs later (I) or colonies counted 9-13 days later (J). Error bar represents SEM. \* $p < 0.05$ , \*\* $p < 0.01$ , \*\*\* $p < 0.001$ .

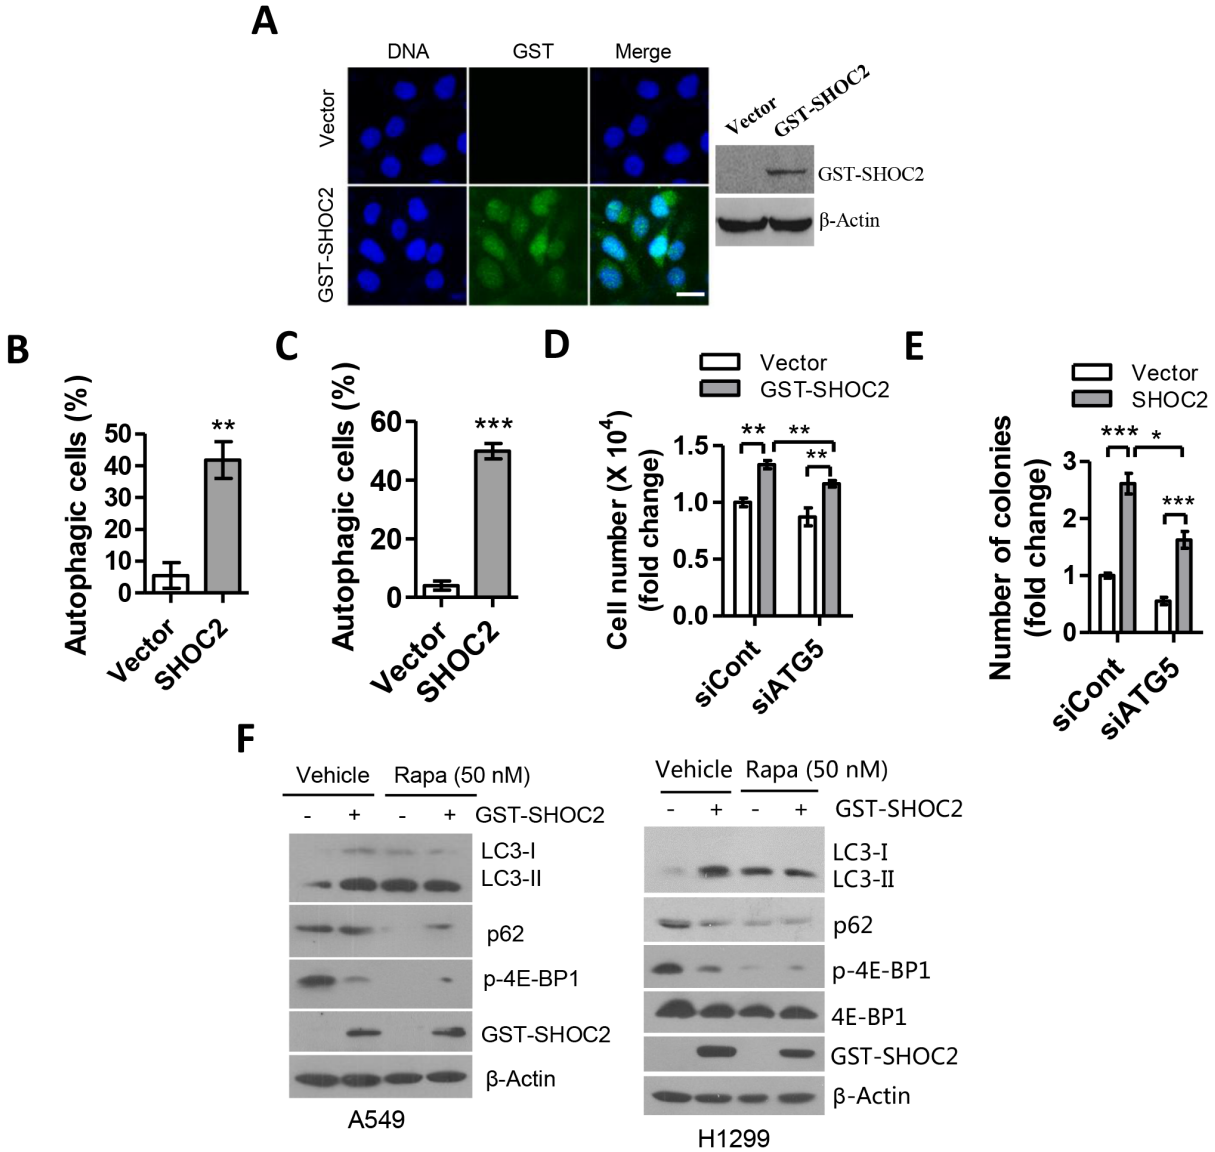

**Figure S4. SHOC2 induces autophagy via inactivation of mTORC1 (Related to Fig 4)**

(A-C) H1299 (A) or A549 (B&C) cells were transfected with GST-SHOC2 for 48 hrs and analyzed by IB (A, left panel) or stained with GST antibody (A, right panel), Cyto-ID Autophagy detection kit (B) or with LC3 antibody (C). Cells containing more than 10 autophagic vacuoles (B) or five LC3 dots (C) were counted as autophagic cells. The data shown are from a single representative experiment out of three repeats. For the experiment shown, at least 100 cells were counted in each group. Error bar represents SEM. \*\* $P < 0.01$ , \*\*\* $P < 0.001$ . Scale bar, 20  $\mu$ m.

(D&E) A549 cells were transfected with indicated plasmids or siATG5 for 48 hrs, followed by assays for cell growth (D) or clonal survival (E). The error bars represent SEM from three independent experiments, \* $p < 0.05$ , \*\* $p < 0.01$ , \*\*\* $p < 0.001$ .

(F) Cells were transfected with GST-SHOC2 for 24 hrs, followed by exposure to 50 nM Rapamycin (Rapa) for 24 hrs, followed by IB.



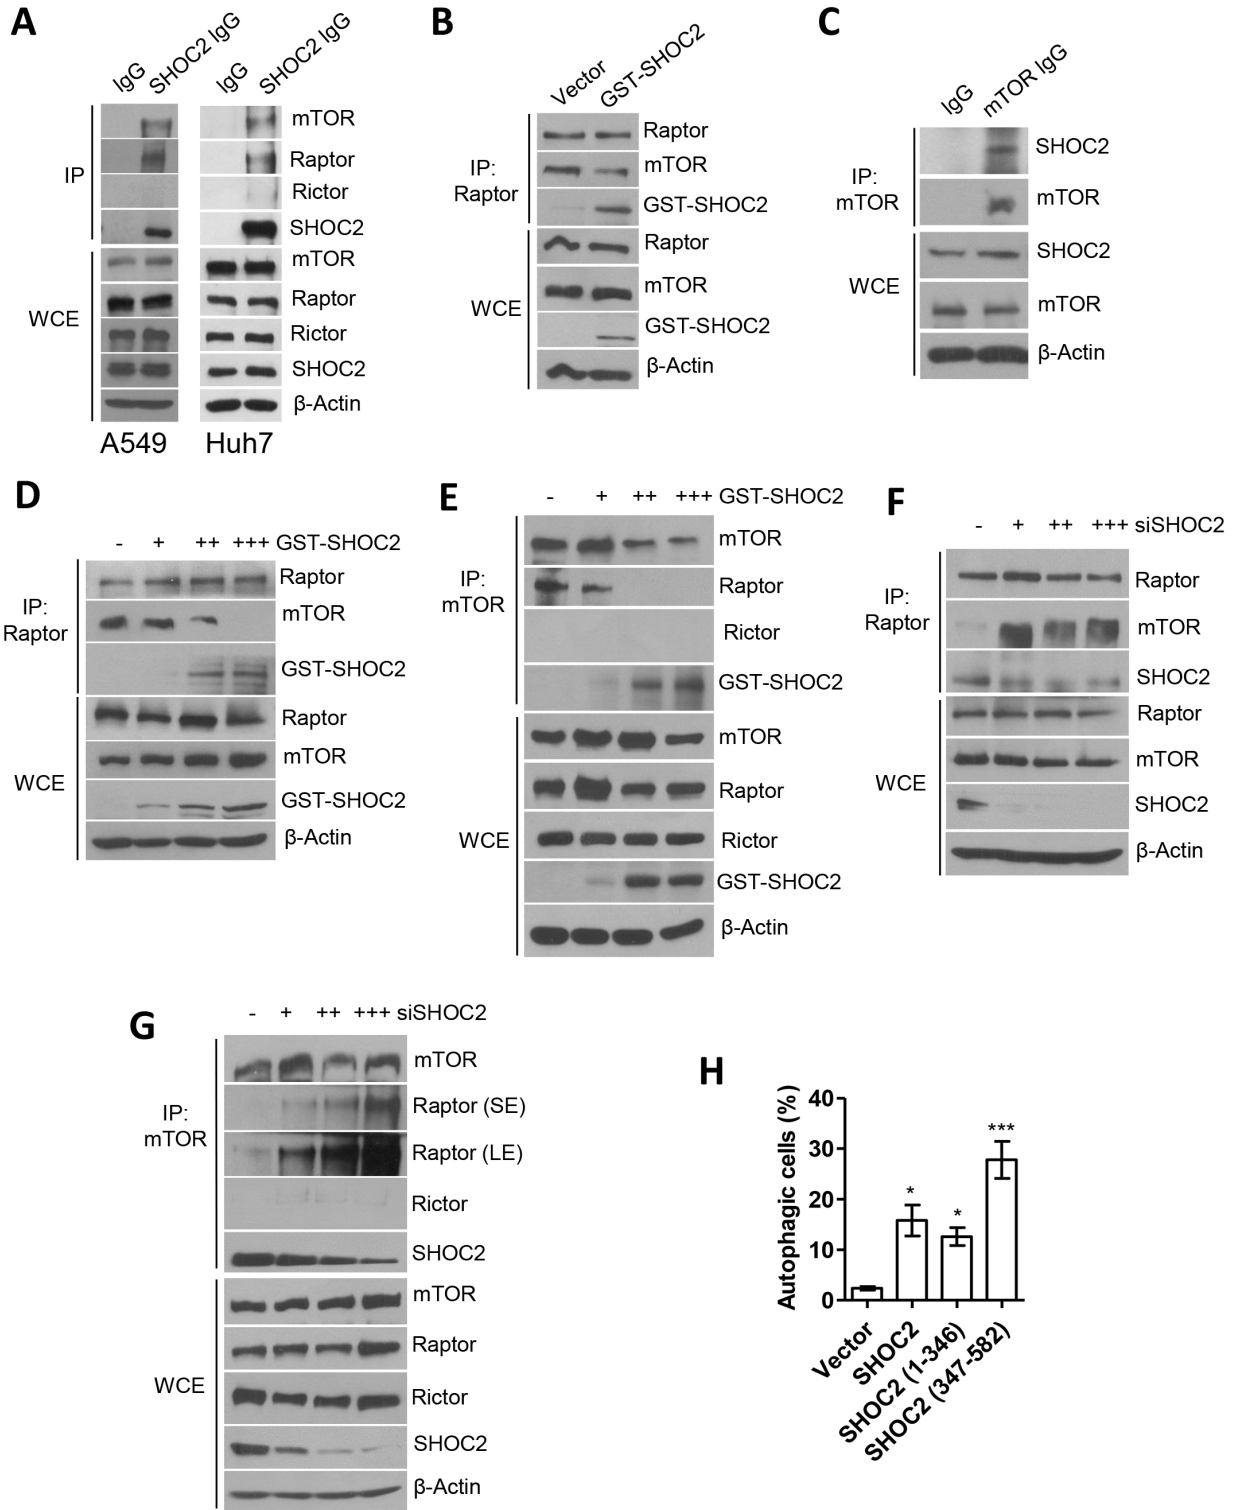

**Figure S5. SHOC2 binds to Raptor and competitively inhibits Raptor-mTOR binding (Related to Fig 5)**

**(A)** Cells were left untransfected plasmids. Cell lysates were prepared for IP and IB with indicated Abs, or for direct IB. WCE, whole cell lysates.

**(B&C)** A549 (B) or H1299 (C) cells were left untransfected (C) or transfected (B) with indicated plasmids. Cell lysates were prepared for IP and IB with indicated Abs, or for direct IB. WCE, whole cell lysates.

**(D-G)** A549 (D&F) or H1299 (E&G) cells were transfected with increasing doses of GST-SHOC2 or siSHOC2 oligoes, followed by IP and IB with indicated Abs, or direct IB.

**(H)** A549 cells were transfected with indicated plasmids for 48 hrs, stained with Cyto-ID Autophagy detection kit, and autophagic cells counted. Error bars represent SEM. \* $p < 0.05$ , \*\*\* $p < 0.001$ .

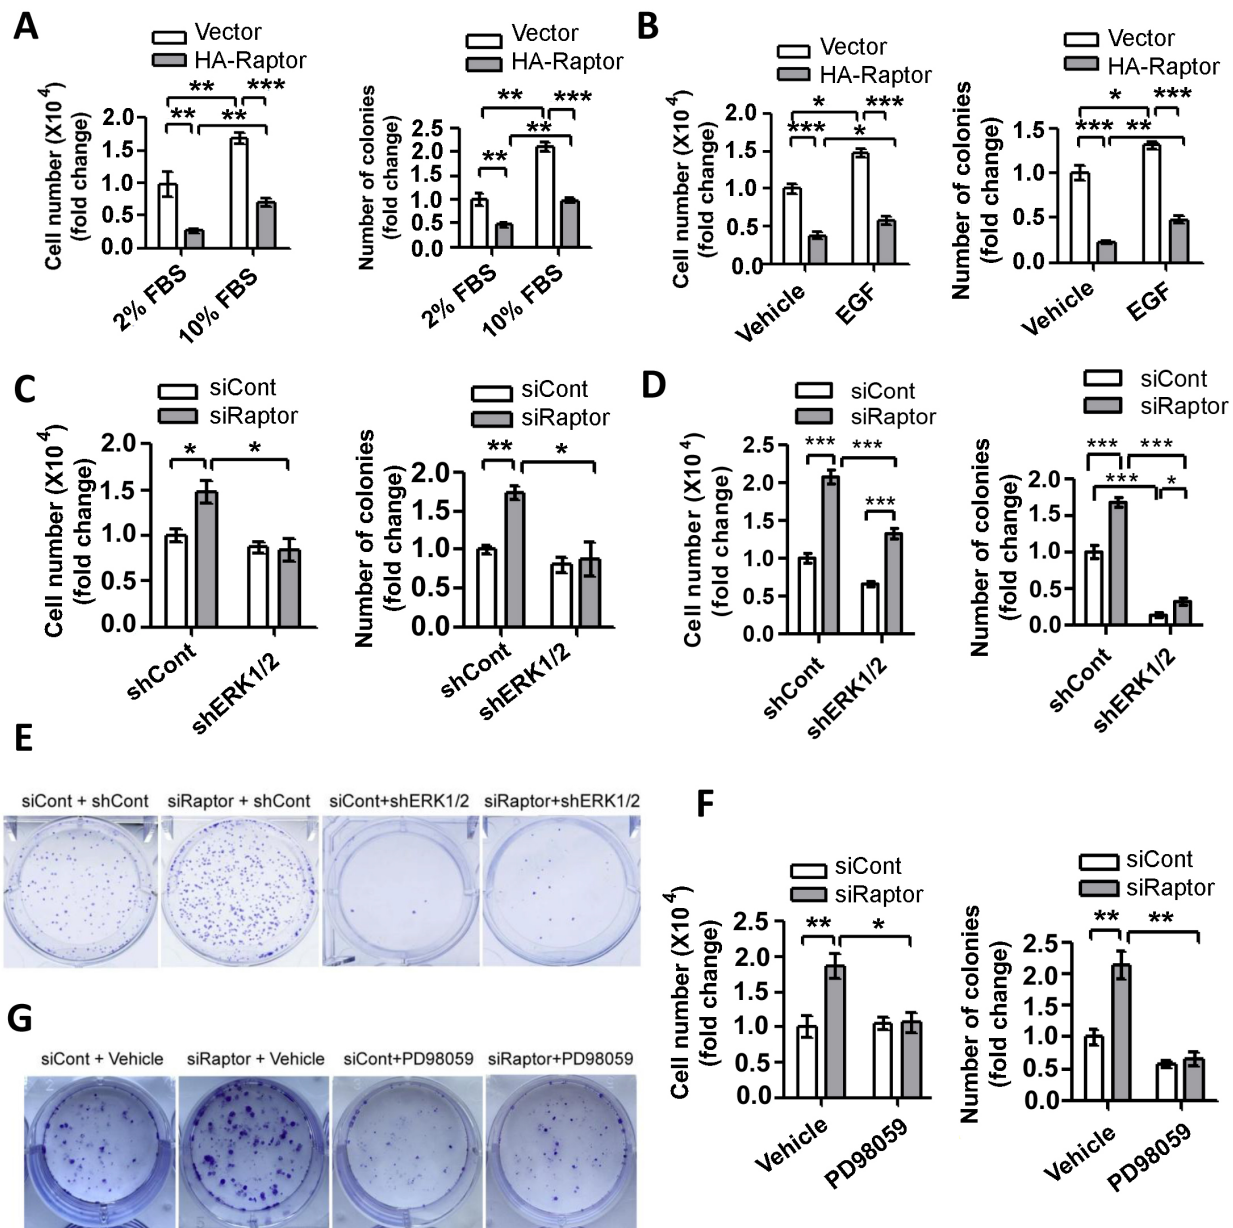

**Figure S6. Raptor negatively regulates the RAS/ERK signal pathway via SHOC2 binding (Related to Fig 6)**

(A&B) H1299 cells were transfected with HA-Raptor in the presence of 2% FBS or EGF (100 ng/ml) for 48 hrs. Cells were plated into 6-well plate for cell counting after 48 hrs, or colonies counting after 9 days.

(C-E) H1299 (C) or A549 (D&E) cells were transfected with indicated siRNA oligoes or shRNAs for 48 hrs. Cells were plated into 6-well plate for cell counting after 48 hrs, or colonies counting after 9 days.

(F&G) H1299 cells were transfected with siRNA oligoes targeting Raptor (siRaptor) for 24 hrs, followed by treatment with PD98059 (10  $\mu$ M) for 24 hrs. Cells were plated and cell number counted 48 hrs later or colonies counted 9-13 days later. Error bars represent SEM. \* $p$ < 0.05; \*\* $p$ < 0.01.

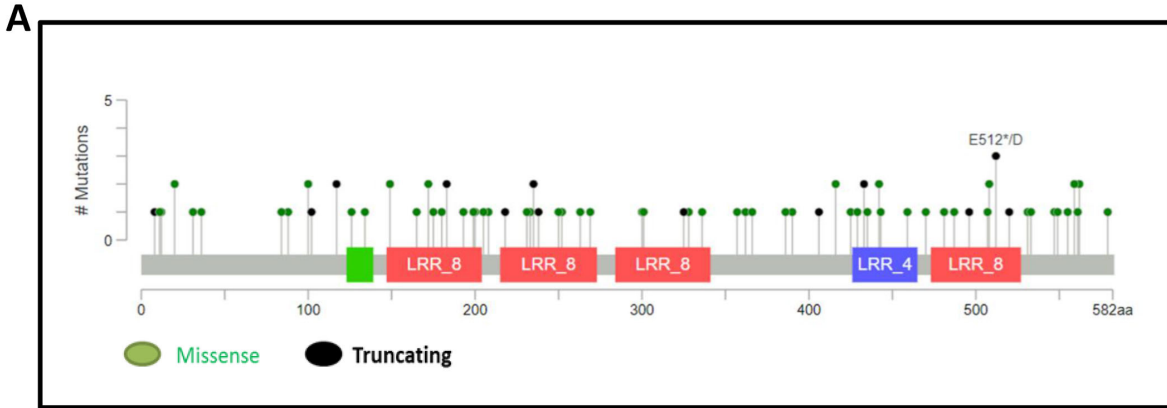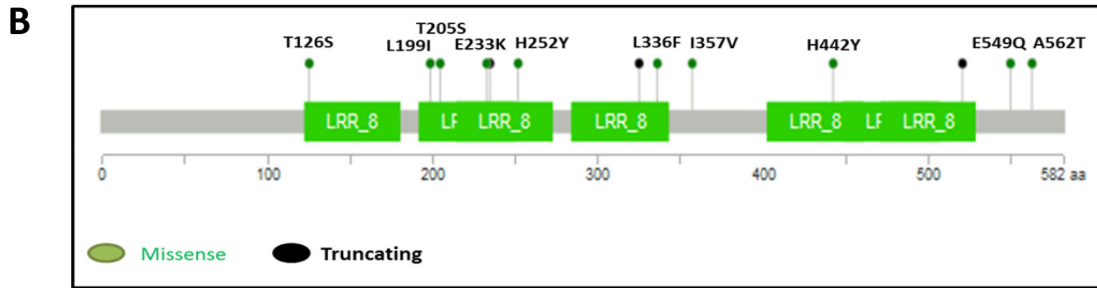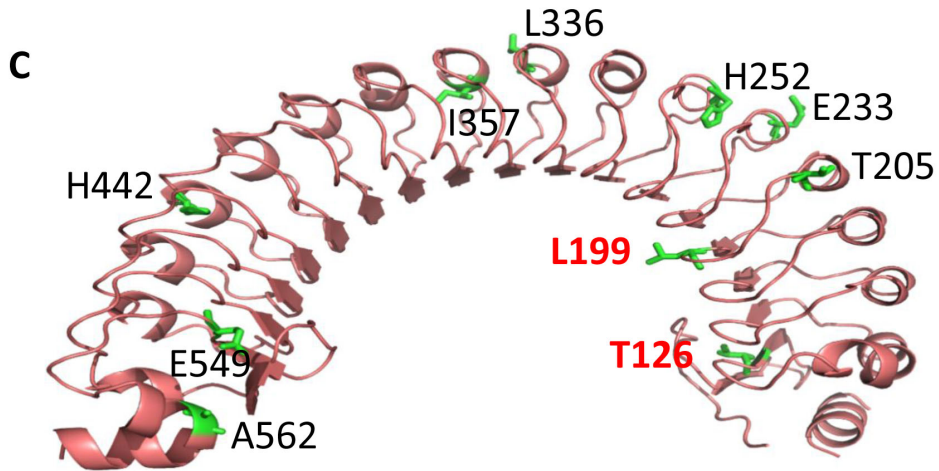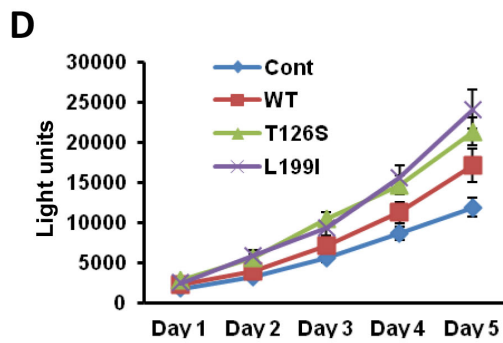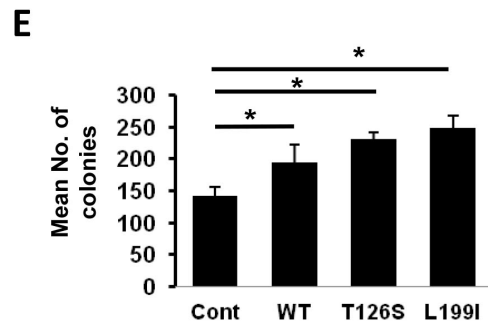

***Figure S7. Gain-of-function SHOC2 mutations found in human lung adenocarcinoma tissues (Related to Fig 7)***

(A) Distribution of SHOC2 mutations observed in all cancer types. Data obtained from the cbiportal.org.

(B) Distribution of SHOC2 mutations found in human lung cancer from TCGA and COSMIC databases.

(C) Computer modeling of SHOC2 structure and locations of two mutations. SHOC2 3D model was simulated by Phyre2, a structure prediction software. Residues shown as sticks are SHOC2 mutations found in human lung cancer.

(D&E) H1299 cells were transfected with wild-type and different SHOC2 mutants. Cell proliferation was assayed by ATPlite (D) and cell survival measured by clonogenic assay (E). Error bars represent SEM. \* $p < 0.05$ .

**Table S1. Primers for RT-qPCR. Related to Figure 3 and Figures S1.**

| Gene                 | Sequence                       |
|----------------------|--------------------------------|
| <i>SHOC2</i> forward | 5'-GGAAAGAAGGACTCCAGTGCTG-3'   |
| <i>SHOC2</i> reverse | 5'- ACTAAACATCCCACCTCTGCTGG-3' |
| <i>FBXW7</i> forward | 5' -CCGAGTCTGGGATGTGGA-3'      |
| <i>FBXW7</i> reverse | 5'- TCTGATGC TTGCTGGGACC-3'    |
| <i>GAPDH</i> forward | 5'-GTTGCCATCAATGACCCCTTC-3     |
| <i>GAPDH</i> reverse | 5'-GCAGGGATGATGTTCTGG-3'       |

**Table S2. Sequences of siRNAs and shRNAs. Related to Figures 1-6 and Figures S3-6.**

| Gene                                 | Sequence                               | Cat No.  |
|--------------------------------------|----------------------------------------|----------|
| <i>SHOC2</i> siRNA-1                 | Targeting 5'-AAGCTGCGGATGCTTGATT-3'    | N/A      |
| <i>SHOC2</i> siRNA-2                 | Targeting 5'-TACCTTCGCTTTAATCGTATA-3'; | N/A      |
| <i>FBXW7</i> siRNA                   | Targeting 5'-ACAGGACAGTGTTTACAAA-3'    | N/A      |
| H1 promoter-driven <i>ERK1</i> shRNA | Targeting 5'-CATGAAGGCCCGAAACTAC-3'    | N/A      |
| H1 promoter-driven <i>ERK2</i> shRNA | Targeting 5'-GCGCTTCAGACATGAGAAC-3'    | N/A      |
| <i>ATG5</i> siRNA                    | Targeting 5'-GGATGAGATAACTGAAAG-3'     | N/A      |
| <i>MEK1</i> siRNA                    | Targeting 5'-GCAGGCAAGTCAAAGACAA-3'    | N/A      |
| <i>MEK2</i> siRNA                    | Targeting 5'-GCCATCGAATATACTTGTT-3     | N/A      |
| <i>Raptor</i> siRNA                  | including 4 siRNA duplexes             | SC-44069 |

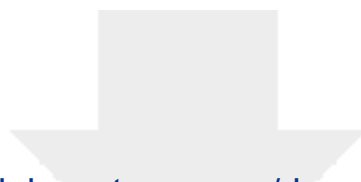

[Click here to access/download](#)

**Supplemental File Sets**

Key Resources Table 1-31-2019.doc

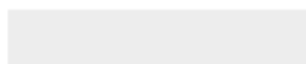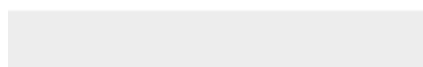

Supplement: NIHMS1026656-supplement-1.pdf [file NIHMS1026656-supplement-1.pdf]
